# Supplementary material for: Reproducible protocols for metagenomic analysis of human faecal phageomes
Source: PubMed Central journal article supplement (PMC5892011; doi:10.1186/s40168-018-0446-z), 2018-04-10

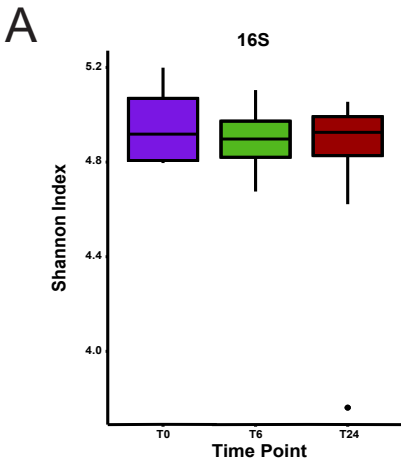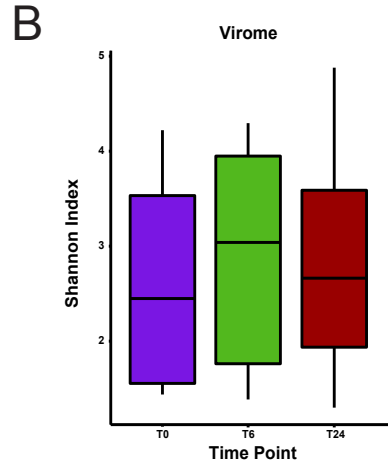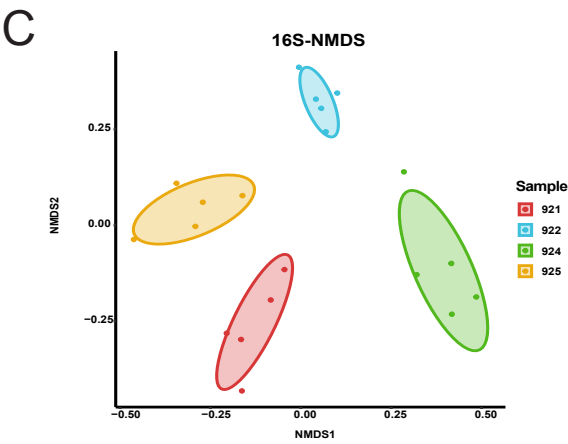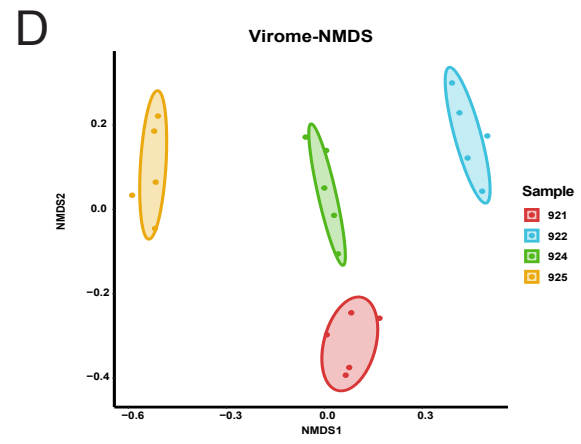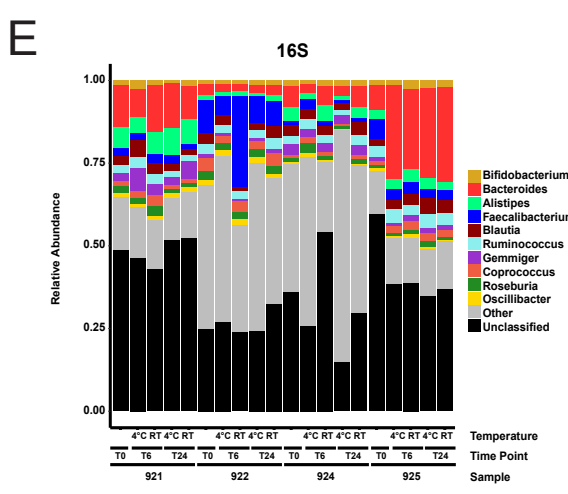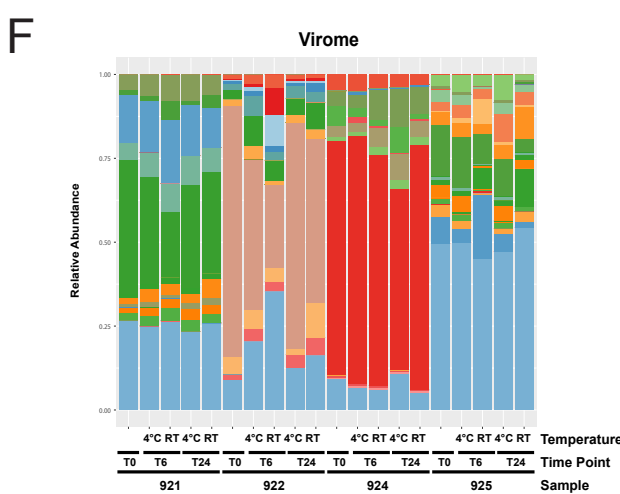

Supplement: 40168_2018_446_MOESM4_ESM.pdf [file 40168_2018_446_MOESM4_ESM.pdf]
